# Supplementary material for: Protectivity of COVID-19 Vaccines and Its Relationship with Humoral Immune Response and Vaccination Strategy: A One-Year Cohort Study
Source: MDPI journal article supplement (doi:10.3390/vaccines10081177), 2022-07-25
Supplement: s1 [file s1]

**Table S1.** Inter-dose intervals by vaccine cohorts.

| Vaccine cohorts      |         | Inter-dose intervals (days) |                  |                  |                  | Interval since the dose-1 (days) * |
|----------------------|---------|-----------------------------|------------------|------------------|------------------|------------------------------------|
|                      |         | between dose-1-2            | between dose-2-3 | between dose-3-4 | between dose-4-5 |                                    |
| 2-dose-CV            | Mean    | 38.75                       |                  |                  |                  | 316.57                             |
|                      | Median  | 29.00                       |                  |                  |                  | 363.00                             |
|                      | Minimum | 13.00                       |                  |                  |                  | 137.00                             |
|                      | Maximum | 229.00                      |                  |                  |                  | 376.00                             |
| 3-dose-CV            | Mean    | 44.13                       | 155.71           |                  |                  | 331.26                             |
|                      | Median  | 30.00                       | 158.00           |                  |                  | 367.00                             |
|                      | Minimum | 14.00                       | 29.00            |                  |                  | 136.00                             |
|                      | Maximum | 262.00                      | 341.00           |                  |                  | 378.00                             |
| 4-dose-CV            | Mean    | 30.13                       | 130.46           | 167.33           |                  | 358.13                             |
|                      | Median  | 29.00                       | 140.00           | 160.00           |                  | 367.00                             |
|                      | Minimum | 28.00                       | 8.00             | 126.00           |                  | 295.00                             |
|                      | Maximum | 36.00                       | 188.00           | 266.00           |                  | 377.00                             |
| 2-dose-BNT           | Mean    | 51.19                       |                  |                  |                  | 209.90                             |
|                      | Median  | 36.50                       |                  |                  |                  | 214.00                             |
|                      | Minimum | 19.00                       |                  |                  |                  | 83.00                              |
|                      | Maximum | 230.00                      |                  |                  |                  | 398.00                             |
| 3-dose-BNT           | Mean    | 35.55                       | 169.25           |                  |                  | 234.73                             |
|                      | Median  | 33.00                       | 165.50           |                  |                  | 228.00                             |
|                      | Minimum | 19.00                       | 92.00            |                  |                  | 144.00                             |
|                      | Maximum | 105.00                      | 397.00           |                  |                  | 461.00                             |
| 2-dose-CV+1-dose-BNT | Mean    | 31.53                       | 162.96           |                  |                  | 349.19                             |
|                      | Median  | 28.50                       | 147.50           |                  |                  | 368.00                             |
|                      | Minimum | 19.00                       | 53.00            |                  |                  | 164.00                             |
|                      | Maximum | 212.00                      | 335.00           |                  |                  | 380.00                             |
| 3-dose-CV+1-dose-BNT | Mean    | 29.00                       | 142.81           | 156.72           |                  | 366.81                             |
|                      | Median  | 28.00                       | 139.00           | 169.00           |                  | 369.00                             |
|                      | Minimum | 28.00                       | 134.00           | 44.00            |                  | 351.00                             |
|                      | Maximum | 34.00                       | 181.00           | 198.00           |                  | 378.00                             |
| 2-dose-CV+2-dose-BNT | Mean    | 29.44                       | 143.34           | 103.05           |                  | 359.91                             |
|                      | Median  | 28.00                       | 140.00           | 98.00            |                  | 368.00                             |
|                      | Minimum | 14.00                       | 30.00            | 21.00            |                  | 173.00                             |
|                      | Maximum | 122.00                      | 295.00           | 292.00           |                  | 420.00                             |
| 2-dose-CV+3-dose-BNT | Mean    | 29.28                       | 139.71           | 55.10            | 128.85           | 369.02                             |
|                      | Median  | 28.00                       | 139.00           | 55.00            | 130.00           | 370.00                             |
|                      | Minimum | 10.00                       | 42.00            | 25.00            | 23.00            | 279.00                             |
|                      | Maximum | 147.00                      | 219.00           | 99.00            | 152.00           | 439.00                             |

CV: CoronaVac™ BNT:Comirnaty®

\* The time period in days between the first day of vaccination and the day when the blood sample was taken

**Table S2.** Incidence of adverse events in vaccine-dose subgroups.

| Adverse events                 | Doses n (colon %) |                    |                     |                    |                  |
|--------------------------------|-------------------|--------------------|---------------------|--------------------|------------------|
|                                | I-dose<br>(n=942) | II-dose<br>(n=942) | III-dose<br>(n=814) | IV-dose<br>(n=466) | V-dose<br>(n=92) |
| Rush                           | 31 (3.3)          | 28(3.0)            | 41(5.0)             | 22(4.7)            | 1 (1.1)          |
| Pain at the injection site     | 281(29.8)         | 273(29.0)          | 369(45.3)           | 229(49.1)          | 22 (24.0)        |
| Swelling                       | 33(3.5)           | 29(3.1)            | 55(6.8)             | 32(6.8)            | 0                |
| Itching                        | 10(1.1)           | 9(1.0)             | 17(2.1)             | 11(2.4)            | 0                |
| Hypoesthesia                   | 2(0.2)            | 2(0.2)             | 8(1.0)              | 7(1.5)             | 0                |
| Induration                     | 31(3.3)           | 30(3.2)            | 46(5.7)             | 26(5.6)            | 1(1.1)           |
| Numbness in the vaccinated arm | 30 (3.2)          | 26(2.8)            | 40(4.9)             | 24(5.1)            | 1(1.1)           |
| Weakness                       | 147(15.6)         | 138(14.6)          | 191(23.4)           | 130(28.0)          | 5(5.4)           |
| Fatigue                        | 120(12.7)         | 112(11.9)          | 175(21.5)           | 111(24.0)          | 6(6.5)           |
| Fever                          | 37(3.9)           | 32(3.4)            | 74(9.1)             | 57(12.2)           | 6(6.5)           |
| Tremor                         | 30(3.2)           | 28(3.0)            | 43(5.3)             | 33(7.0)            | 3(3.2)           |
| Chest pain                     | 10(1.1)           | 6(0.6)             | 13(1.6)             | 5(1.1)             | 0                |
| Diarrhoea                      | 9(1.0)            | 3(0.3)             | 5(0.6)              | 6(1.2)             | 1(1.1)           |
| Nausea                         | 18(1.9)           | 11(1.2)            | 14(1.7)             | 4(0.9)             | 1(1.1)           |
| Vomiting                       | 3(0.3)            | 4(0.4)             | 6(0.7)              | 4(0.9)             | 1(1.1)           |
| Headache                       | 93(9.9)           | 78(8.3)            | 114(14.0)           | 74(15.9)           | 7(7.7)           |
| Dizziness                      | 35(3.7)           | 32(3.4)            | 50(6.1)             | 27(5.8)            | 3(3.2)           |
| Vertigo                        | 20(2.1)           | 15(1.6)            | 28(3.4)             | 21(4.5)            | 2(2.1)           |
| Myalgia                        | 69(7.3)           | 62(6.6)            | 127(15.6)           | 85(18.2)           | 2(2.1)           |
| Back pain                      | 43(4.6)           | 39(4.1)            | 78(9.6)             | 48(10.3)           | 2(2.1)           |
| Joint pain                     | 54(5.7)           | 55(5.8)            | 97(12.0)            | 73(15.7)           | 4(4.3)           |
| Cough                          | 6(0.6)            | 4(0.4)             | 7(0.8)              | 5(1.1)             | 0                |
| Sore throat                    | 7(0.7)            | 7(0.7)             | 11(1.3)             | 6(1.3)             | 1(1.1)           |
| Dyspnoea                       | 13(1.4)           | 7(0.7)             | 15(1.8)             | 9(1.9)             | 0                |
| Papule                         | 0                 | 0                  | 0                   | 0                  | 0                |
| Abdominal pain                 | 3(0.3)            | 3(0.3)             | 4(0.5)              | 1(0.2)             | 0                |
| Loss of appetite               | 9(1.0)            | 7(0.7)             | 9(1.1)              | 8(1.8)             | 1(1.1)           |
| Palpitation                    | 13(1.4)           | 10(1.1)            | 7(0.8)              | 6(1.3)             | 0                |
| Anosmia                        | 6(0.6)            | 1(0.1)             | 3(0.4)              | 1(0.2)             | 0                |
| Loss of taste                  | 2(0.2)            | 0                  | 1(0.1)              | 1(0.2)             | 0                |
| Rash                           | 1(0.1)            | 0                  | 1(0.1)              | 1(0.2)             | 0                |
| Numbness in the tongue         | 5(0.5)            | 1(0.1)             | 1(0.1)              | 0                  | 0                |
| Fainting                       | 3(0.3)            | 1(0.1)             | 1(0.1)              | 1(0.2)             | 0                |
| Increased blood pressure       | 12(1.3)           | 9(1.0)             | 6(0.7)              | 2(0.4)             | 0                |
| Decreased blood pressure       | 3(0.3)            | 3(0.3)             | 0                   | 2(0.4)             | 0                |
| Urticaria                      | 2(0.2)            | 0                  | 1(0.1)              | 0                  | 0                |
| Anaphylaxis                    | 1(0.1)            | 1(0.1)             | 0                   | 0                  | 0                |
| Metallic taste in the tongue   | 1(0.1)            | 1(0.1)             | 1(0.1)              | 1(0.2)             | 1(1.1)           |
| Lymphadenopathy                | 1(0.1)            | 1(0.1)             | 3(0.4)              | 2(0.4)             | 1(1.1)           |
